# Supplementary material for: Immunocapture Magnetic Beads Enhanced the LAMP-CRISPR/Cas12a Method for the Sensitive, Specific, and Visual Detection of Campylobacter jejuni
Source: MDPI journal article supplement (doi:10.3390/bios12030154), 2022-03-02
Supplement: s1 [file s1]

Supplementary

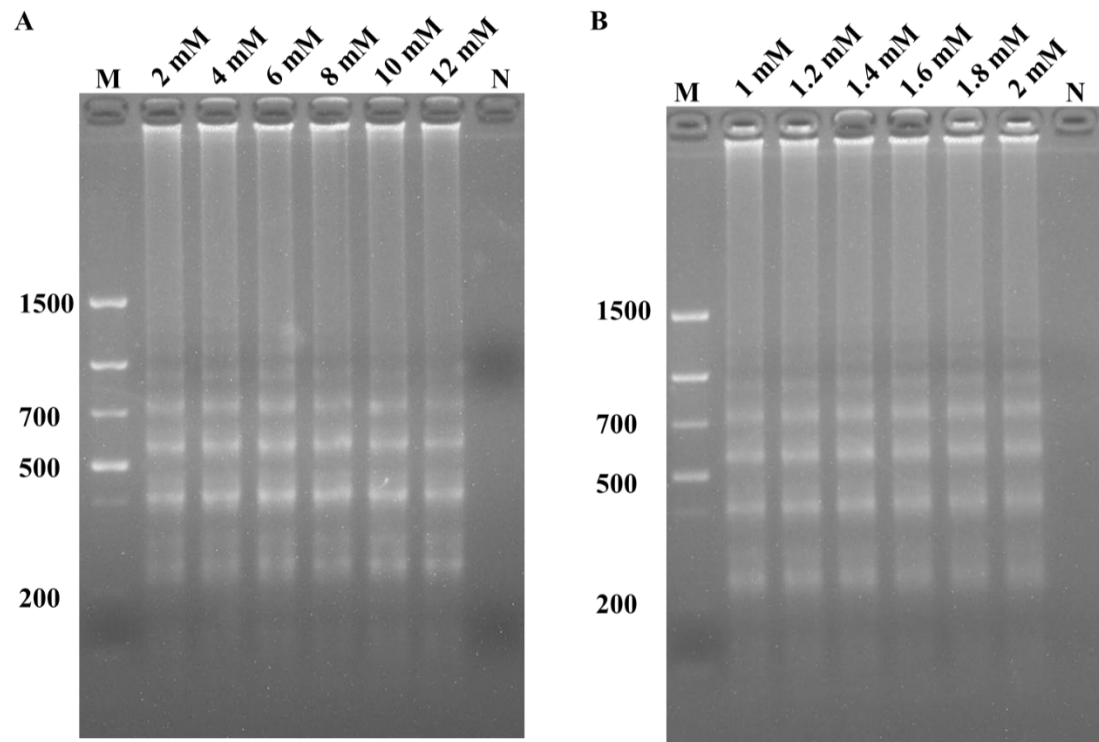

**Figure S1** Evaluation of  $\text{Mg}^{2+}$  and dNTPs in the LAMP reaction.

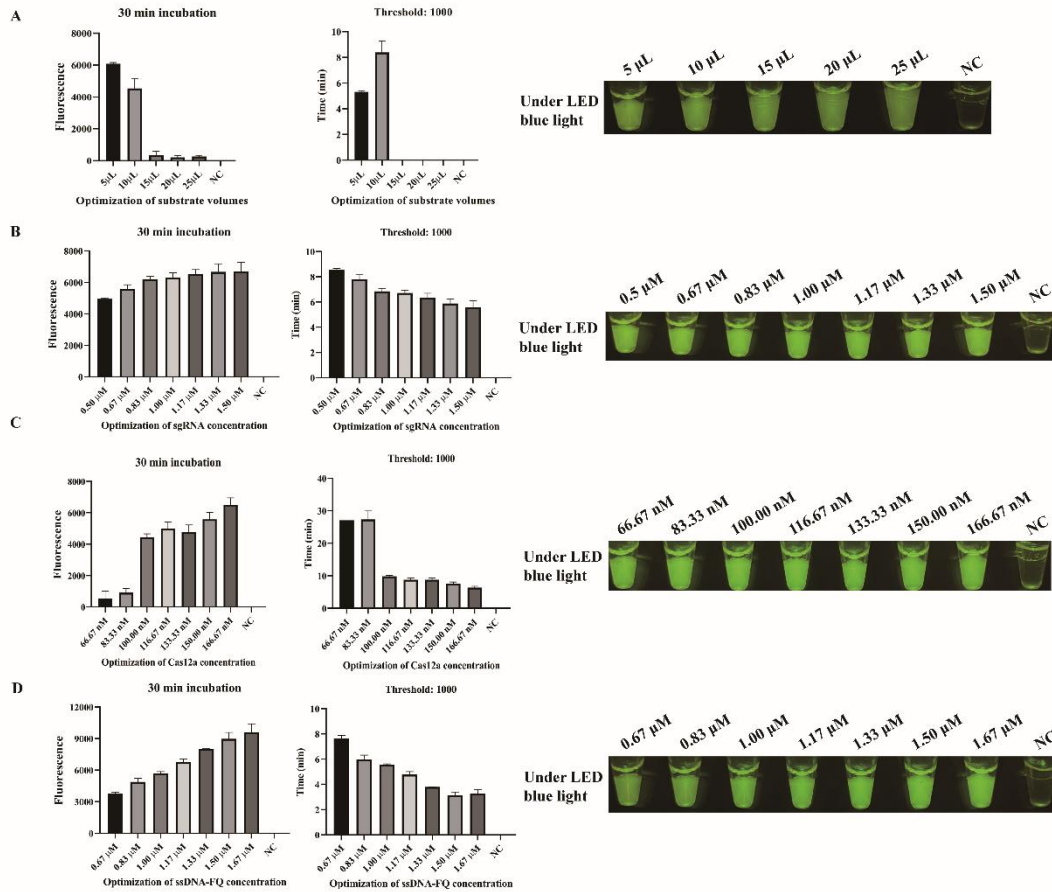

**Figure S2** Evaluation of the concentration of sgRNA, Cas12a, the ssDNA-FQ probe, and the substrate volume.

**Table S1.** Average binding efficiency of ICB.

| Initial<br>concentration<br>(CFU/mL) | 20 min after capture (CFU/mL) |      |      |               | Difference<br>before and<br>after the<br>capture | Binding<br>efficiency<br>(%) | Average<br>binding<br>efficiency (%) |
|--------------------------------------|-------------------------------|------|------|---------------|--------------------------------------------------|------------------------------|--------------------------------------|
|                                      | 1                             | 2    | 3    | Mean<br>value |                                                  |                              |                                      |
|                                      |                               |      |      |               |                                                  |                              |                                      |
| $8 \times 10^3$                      | 1220                          | 1430 | 1310 | 1320          | 7220                                             | 84.5                         | 92.4                                 |
| $8 \times 10^2$                      | 40                            | 80   | 70   | 63.3          | 790.7                                            | 92.6                         |                                      |
| $8 \times 10^1$                      | 0                             | 0    | 0    | 0             | 80                                               | 100                          |                                      |

**Table S2** The sequence information of all used primers, sgRNAs, and the ssDNA probe

| Name | Sequence (5'-3')     | Length (bp) |
|------|----------------------|-------------|
| 1F3  | GCGCAAAATTAAGAATTTGG | 23          |
| 1B3  | GCAGCAAGCAATAAGAAGT  | 20          |

|                |                                                       |    |
|----------------|-------------------------------------------------------|----|
| 1FIP           | GCACGAAGTCCTATTTTTTTATCGCTTTTGTTTATGAGGAAATAGGAAAAACA | 54 |
|                | G                                                     |    |
| 1BIP           | ACAAGAATGCACAAATTTGCCTTTTTTCCATCATGACCACAAGC          | 45 |
| 2F3            | GAAAAACAGGCGTTGTGG                                    | 18 |
| 2B3            | CCTCTTCAGCAGGTTGAA                                    | 18 |
| 2FIP           | GCATTCTTGTAAGGCAAAGCATTTTTGGAAATAGCGATAAAAAAATAGGAC   | 52 |
| 2BIP           | TGCATGCTTGTTGGTCATGATGTTTTCGCCATTAAAAATTCTGACTTG      | 46 |
| 3F3            | TTTGGTTATGAGGTTTATGAGG                                | 22 |
| 3B3            | GCAGCAAGCAATAAAGAAGT                                  | 20 |
| 3FIP           | CCATATCTGCACGAAGTCCTATTTTTTTTAAATAGGAAAAACAGGCGTT     | 49 |
| 3BIP           | ACAAGAATGCACAAATTTGCCTTTTTTCCATCATGACCACAAGC          | 45 |
| 4F3            | GGCGAATTTGAAAAAATTCGTC                                | 22 |
| 4B3            | GCATCCATATCTGCACGA                                    | 18 |
| 4FIP           | TGCGCCACTAATTTTGCAGTACTTTTATCAAATTCATGAAAATCCTGAGC    | 50 |
| 4BIP           | GAGGAAATAGGAAAAACAGGCGTTTTTCCTATTTTTTTATCGCTATTTCCCT  | 52 |
| 5F3            | GATGATGGCTTCTTCGGATA                                  | 20 |
| 5B3            | TGATATTAAGCATGTCCTGC                                  | 22 |
| 5FIP           | AGCAGCATAAATAGGATCTTTTGCCTTTTTATTGAAGTTATTGGAAGGGGT   | 51 |
| 5BIP           | TGTGGCTTTACAAAGCATAGTATCTTTTAGCTCCTATGCTTACAACGT      | 49 |
| sgRNA1         | GAAUUUCUACUGUUGUAGAUCAAGAAUGCACAAAUUGCCUUAU           | 44 |
| sgRNA2         | GAAUUUCUACUGUUGUAGAUUUUUUGCUUUUAUAAGGCAAAU            | 44 |
| sgRNA3         | GAAUUUCUACUGUUGUAGAUCAAGCAAUAAAGAAGUAGUAU             | 44 |
| sgRNA4         | GAAUUUCUACUGUUGUAGAUCCUUUACAAGAAUGCACAAAUUG           | 44 |
| sgRNA5         | GAAUUUCUACUGUUGUAGAUUAAGGCAAAUUGUGCAUUCUUGU           | 44 |
| sgRNA6         | GAAUUUCUACUGUUGUAGAUUUUAUAAGGCAAAUUGUGCAU             | 44 |
| ssDNA-FQ probe | FAM-TTTTTT-BHQ1                                       | 6  |
